# Supplementary material for: First example of a covalently bound dimeric inverted porphyrinElectronic supplementary information (ESI) available: NMR, NOESY and HMBC data and molecular models for 5 and 6, NMR data for 5-HCl, cyclic voltammograms for 3–5 and electronic spectra for 5 and 6. See http://www.rsc.org/suppdata/cc/b1/b109760c/
Source: Royal Society of Chemistry journal article supplement (doi:10.1039/b109760c), 2001-12-11
Supplement: b109760c.pdf [file b109760c.pdf]

## S1

NMR data for 2-(21'-(5',10',15',20'-tetraphenyl-2'-aza-21'-carbaporphyrinatonic-kel(II)))-methyl-5,10,15,20-tetraphenyl-2-aza-21-carbaporphyrinatonic-nickel(II) **5**

$\delta_{\text{H}}$ (CDCl<sub>3</sub>, 298 K) 9.35 (s, 1H, 3'), 8.57 (d, 5.0 Hz, 1H, p'), 8.53 (d, 5.0 Hz, 1H, p'), 8.48 (d, 4.6 Hz, 1H, p'), 8.46 (d, 4.6 Hz, 1H, p'), 8.44 (d, 5.0 Hz, 1H, p'), 8.38 (d, 5.0, 1H, p'), 8.21 (b, 1H), 8.20 (d, 4.0 Hz, 1H,p ), 8.20 (b, 1H), 8.14 (b, 2H), 8.01 (m, 2H), 7.94 (m, 1H), 7.88 (d, 5.0 Hz, 1H, p ), 7.85 (d, 5.0 Hz, 1H, p), 7.82 (b, 2H), 7.80 (d, 5.0 Hz, 1H, p), 7.78 (b, 4H), 7.66 (b, 1H), 7.61-7.50 (overlapping multiplets, 7H), 7.41 (m, 2H), 7.34 (d, 5.0 Hz, 1H, p), 6.96 (d, 5.0 Hz, 1H, p), 6.71 (s, 1H, 3), 5.79 (m, 1H, *ortho*, 20-Ph), 5.57 (overlapping multiplets, 2H, *ortho+para*, 20-Ph), 5.47 (m, 1H, *meta*, 20-Ph), 5.40 (m, 1H, *meta*, 20-Ph), 0.11 (d, 15.6 Hz, 1H, 2,21'-CH<sub>2</sub>), -0.47 (d, 15.6 Hz, 1H, 2,21'-CH<sub>2</sub>);

$\delta_{\text{C}}$ (CDCl<sub>3</sub>, 298 K) 176.4 (1'-C), 156.1, 155.2 (3'-CH) 152.8, 152.5, 151.2 (4'-C), 150.3, 150.1, 149.7, 148.7,147.7, 147.2, 146.9, 146.7 (3-CH), 144.9, 143.9, 141.5, 141.3, 140.9, 140.8, 140.1, 139.8, 139.4, 137.9, 136.0, 135.3, 134.4 (1-C), 134.2, 134.0, 133.5, 133.4, 133.3, 133.1, 133.0, 133.0, 132.8, 132.6, 132.5, 132.0, 131.3, 130.6, 129.8, 129.2, 128.8, 128.6, 128.3, 128.3, 128.2, 127.7, 127.4, 127.2, 127.2, 127.0, 126.9, 126.7, 125.9, (4-C) 125.5, 125.2 125.0, 124.4, 122.8, 121.8 (21-C), 120.1, 117.8, 116.9, 47.2 (2,21'-CH<sub>2</sub>), 34.1 (21'-C)

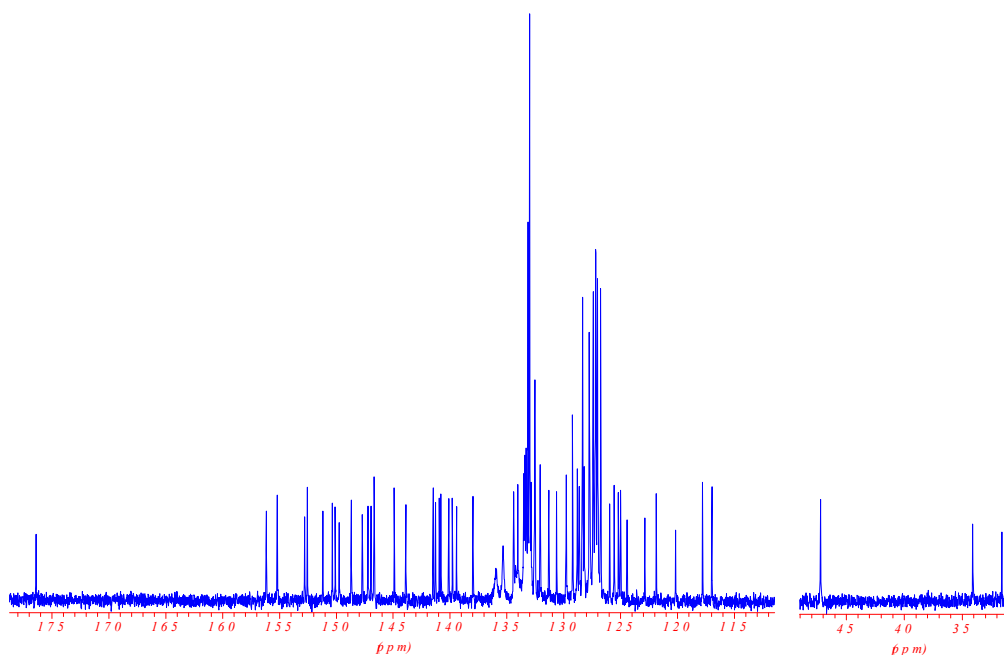

125.7 MHz <sup>13</sup>C NMR spectrum of **5**, CDCl<sub>3</sub>, 298K

*Izabela Schmidt and Piotr J. Chmielewski\**, First example of a covalently bound dimeric inverted porphyrin

## S2

Important trough-space proton-proton contacts (NOESY) and long-range proton-carbon couplings (HMBC) observed for 2-(21'-(5',10',15',20'-tetraphenyl-2'-aza-21'-carbaporphyrinatonicel(II)))methyl-5,10,15,20-tetraphenyl-2-aza-21-carbaporphyrinatonicel(II) **5**

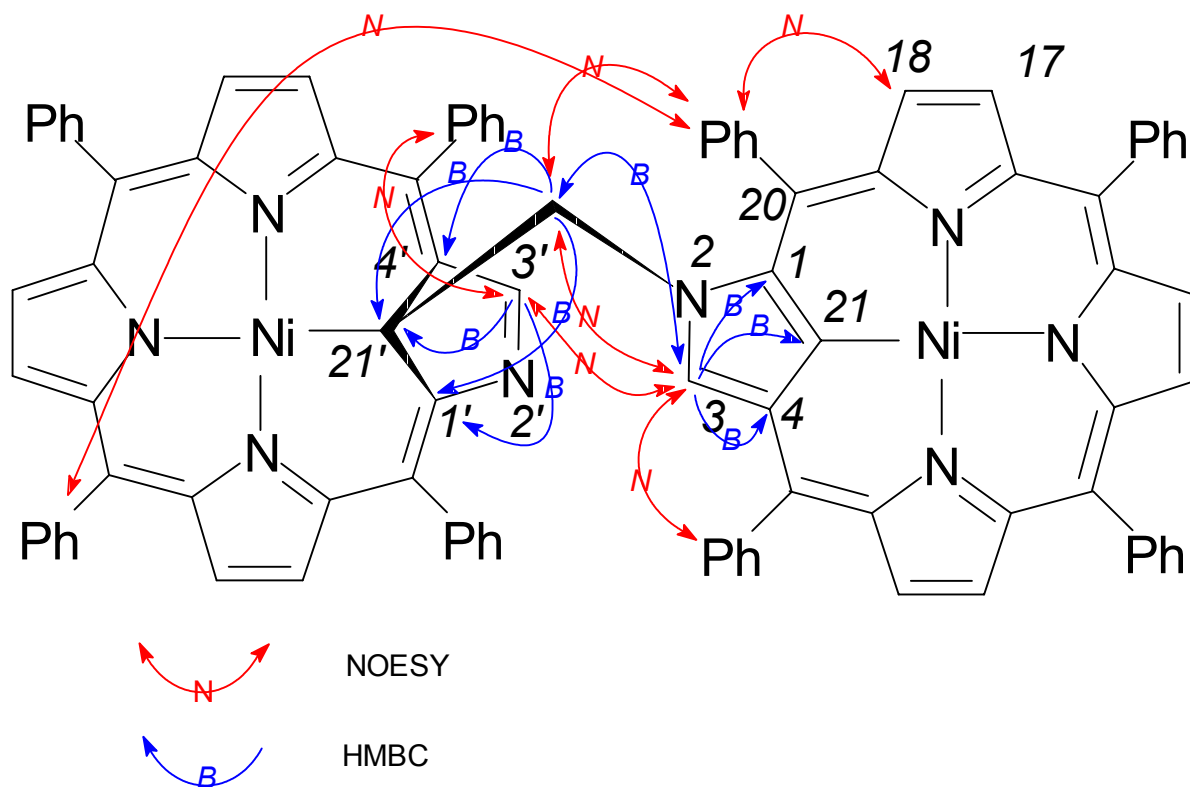

*Izabela Schmidt and Piotr J. Chmielewski\**, First example of a covalently bound dimeric inverted porphyrin

S3

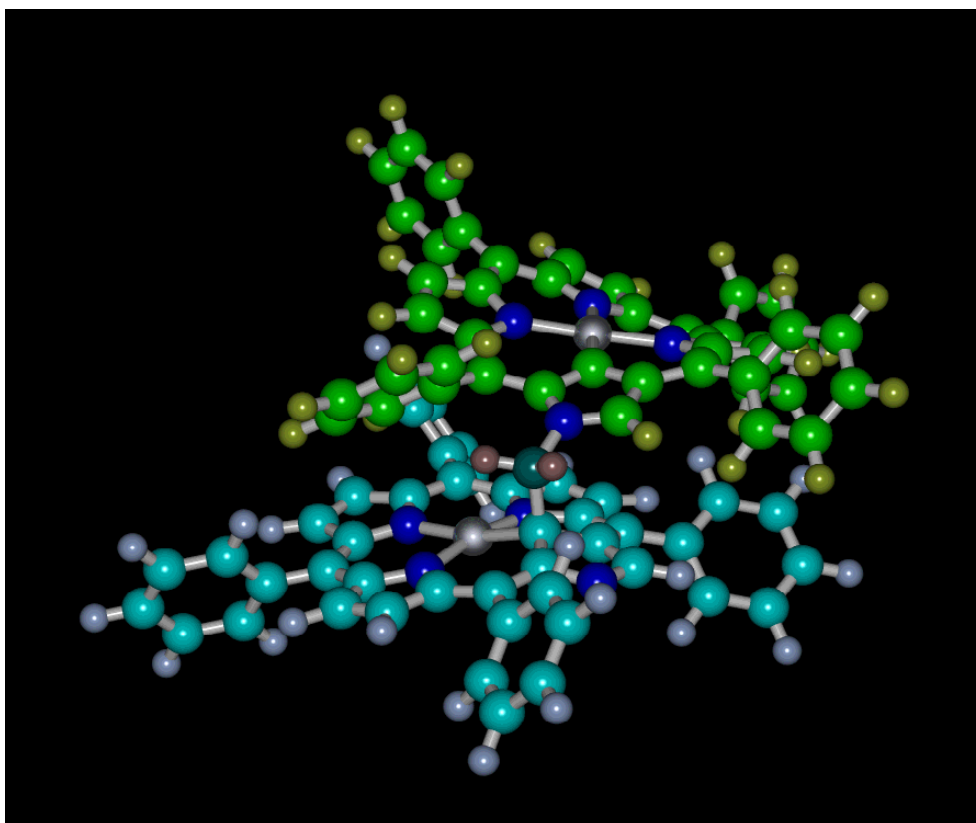

Molecular model of **5** optimized by MM+ forcefield based on NMR data.

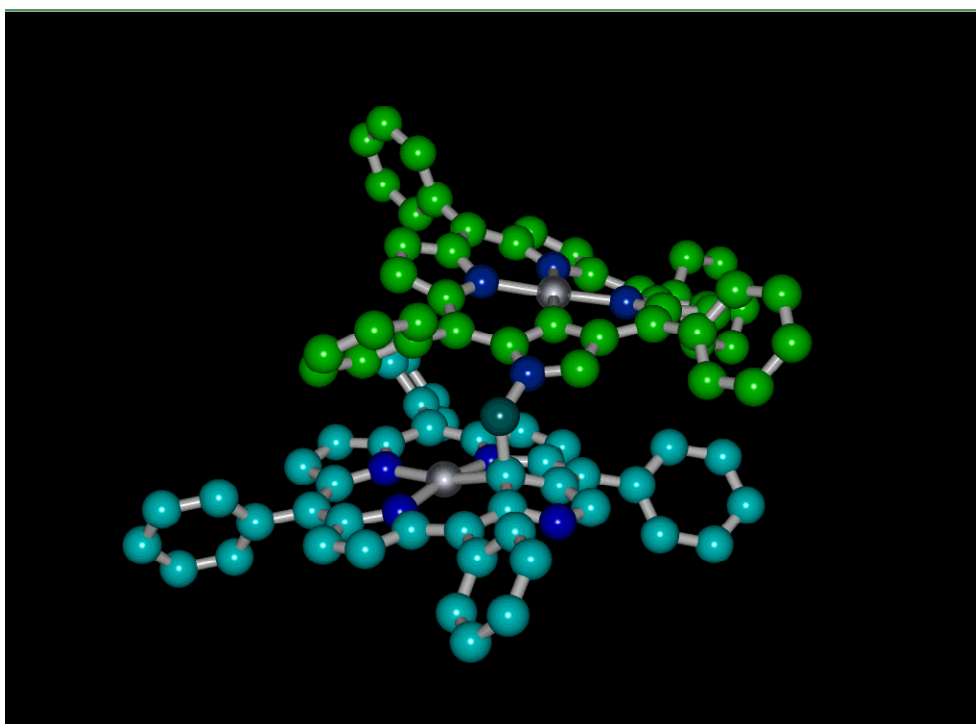

Molecular model of **5** optimized by MM+ forcefield based on NMR data. Protons are omitted for clarity.

*Izabela Schmidt and Piotr J. Chmielewski\**, First example of a covalently bound dimeric inverted porphyrin

## S4

NMR data for bis-(2,2'-(5,10,15,20-tetraphenyl-2-aza-21-carbaporphyrinato)nickel(II))methane **6**

$\delta_{\text{H}}$ (500 MHz,  $\text{CDCl}_3$ , 298 K) 7.86 (2H, d, 4.9 Hz), 7.81 (2H, d, 4.9 Hz), 7.79 (2H, d, 4.7 Hz), 7.79 (b,4H), 7.78 (2H, s, 3), 7.76 (4H, b), 7.64 (2H, d, 4.7 Hz), 7.61 (2H, d, 4.7 Hz), 7.54 (6H, m), 7.52 (2H, d, 4.9 Hz), 7.48 (2H, d, 7.2 Hz), 7.41 (2H, b), 7.39 (2H, d, 7.8 Hz), 7.26 (4H, b), 7.14 (2H, d, 7.5 Hz), 6.95 (4H, m), 6.86 (4H, b), 5.55 (2H, s,  $-\text{CH}_2-$ ).

$\delta_{\text{H}}$ (500 MHz,  $\text{CDCl}_3$ , 213 K) 7.94 (2H, s, 3), 7.91 (2H, d, 5.2 Hz), 7.87 (2H, d, 4.8 Hz), 7.84 (2H, d, 5.2 Hz), 7.79 (4H, m), 7.75 (2H, d, 7.0 Hz), 7.72 (2H, d, 6.4 Hz), 7.69 (2H, d, 5.2 Hz), 7.65 (2H, b), 7.62 (2H, d, 5.2 Hz), 7.60 (2H, d, 5.2 Hz), 7.56 (8H, overlapping multiplets), 7.50 (2H, d, 7.3 Hz), 7.42 (2H, d, 7.4 Hz), 7.39 (2H, d, 6.7 Hz), 7.32 (2H, t, 7.4 Hz), 7.21 (4H, t, 6.6 Hz), 7.15 (2H, d, 7.4 Hz), 7.04 (4H, overlapping multiplets), 6.79 (2H, t, 7.4 Hz), 6.69 (2H, t, 7.4 Hz), 5.55 (2H, s,  $-\text{CH}_2-$ ).

$\delta_{\text{C}}$ (125.7 MHz,  $\text{CDCl}_3$ , 298 K) 154.6, 154.5, 152.3, 151.6, 149.7, 149.0, 148.8 (3-CH), 146.1, 146.0, 145.4, 145.2, 141.2, 140.8, 134.1 (1-C), 133.9, 133.2, 133.1, 133.0, 132.5, 132.2, 131.7, 131.7, 131.3, 130.3, 128.3, 127.9, 127.4, 127.3, 127.1, 123.0 (21-C), 64.6 ( $-\text{CH}_2-$ ).

*Izabela Schmidt and Piotr J. Chmielewski\**, First example of a covalently bound dimeric inverted porphyrin

## S5

Important trough-space proton-proton contacts (NOESY) and long-range proton-carbon couplings (HMBC) observed for bis-(2,2'-(5,10,15,20-tetraphenyl-2-aza-21-carbaporphyrinato)nickel(II))methane **6**

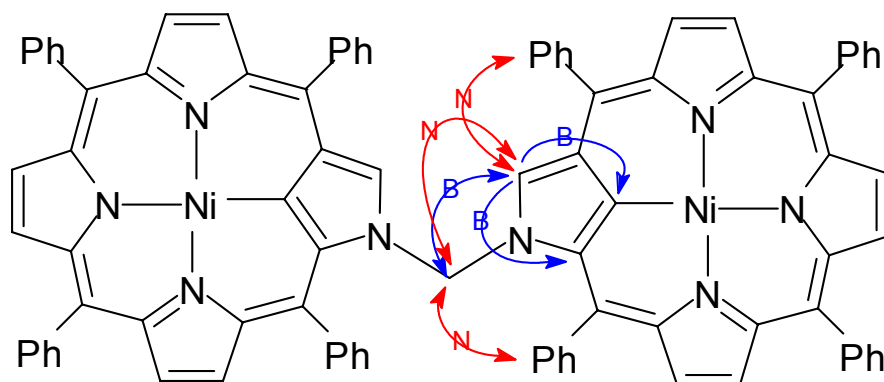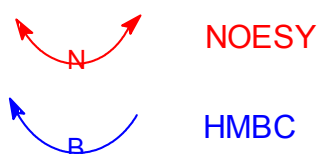

Izabela Schmidt and Piotr J. Chmielewski\*, First example of a covalently bound dimeric inverted porphyrin

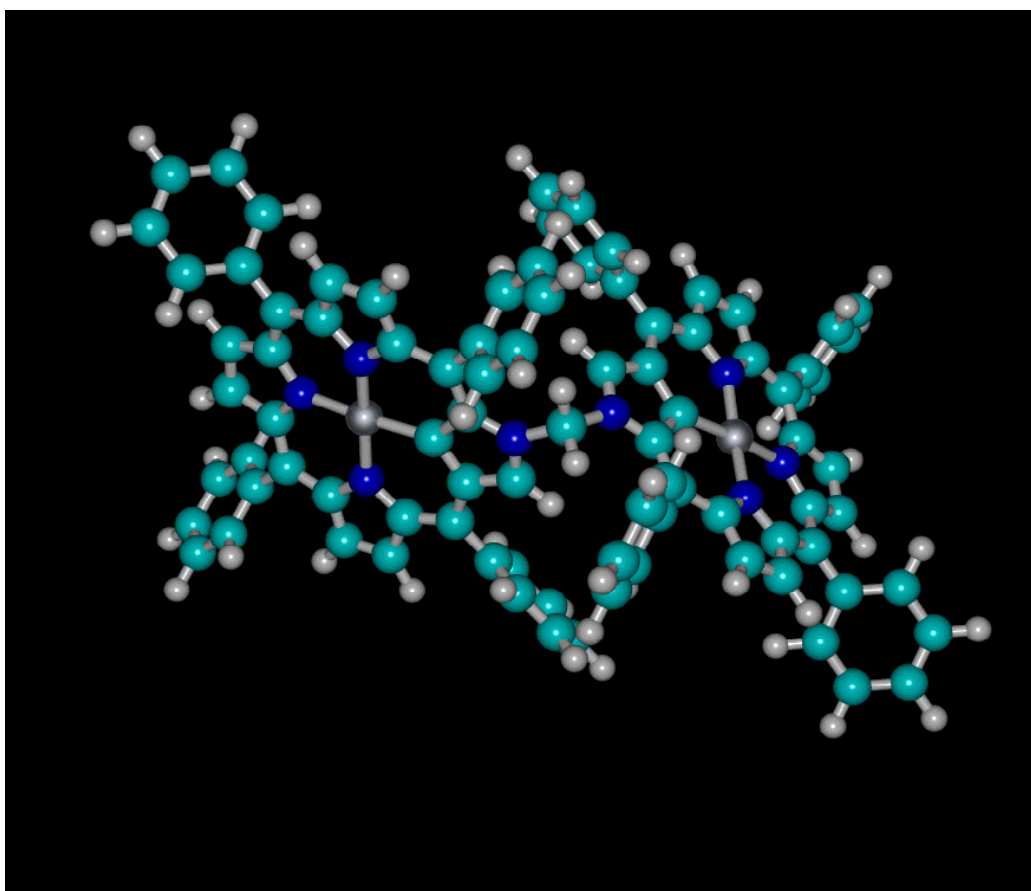

Molecular model of **6** optimized by MM+ forcefield based on NMR data.

*Izabela Schmidt and Piotr J. Chmielewski\**, First example of a covalently bound dimeric inverted porphyrin

## S7

<sup>1</sup>H NMR data for **5**-HCl, 298 K, CDCl<sub>3</sub>

59.9 (CH<sub>2</sub>), 56.3 (p'), 55.2 (p'), 52.3 (p'), 48.3 (p'), 43.1 (CH<sub>2</sub>), 22.7 (p'), 20.9 (3), 20.3 (p'), 11.4, 10.7, 10.3, 10.0, 9.5, 9.3, 9.2, 9.0, 8.6, 8.3, 8.1, 7.9, 6.8, 6.5, 6.3, 0.3, -1.6, -2.3 (3'), -3.3, -22.8 (2'-NH)

<sup>1</sup>H NMR data for **5**-HCl, 213 K, CDCl<sub>3</sub>

78.9 (CH<sub>2</sub>), 73.8 (p'), 72.5 (p'), 68.4 (p'), 63.1 (p'), 59.8 (CH<sub>2</sub>), 28.9 (p'), 25.9 (p'), 25.7 (3), 12.9, 12.3, 12.0, 11.2, 10.2, 10.0, 9.8, 9.0, 9.0, 8.9, 8.4, 8.2, 8.1, 7.8, 7.6, 7.6, 7.0, 6.4, 6.0, 5.9, -1.9, -2.0, -4.4, -4.8, -6.3, -7.8 (3'), -35.5 (2'-NH)

*Izabela Schmidt and Piotr J. Chmielewski\**, First example of a covalently bound dimeric inverted porphyrin

S8

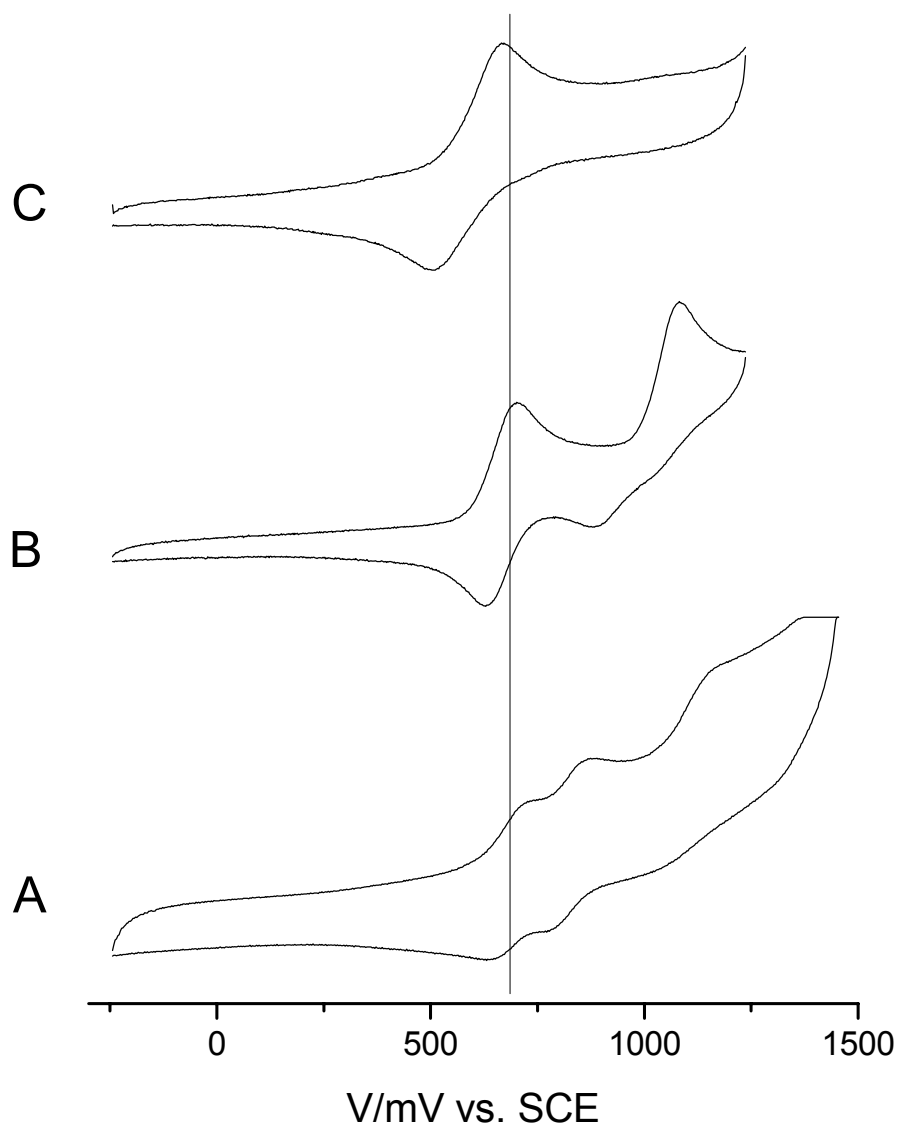

Cyclic voltammograms of **5** (trace A), **3** (trace B), and **4** (trace C) in  $\text{CH}_2\text{Cl}_2$  (supporting electrolyte: 0.1 M tetrabutylammonium perchlorate; working electrode: glassy carbon; reference electrode: SCE).

*Izabela Schmidt and Piotr J. Chmielewski\**, First example of a covalently bound dimeric inverted porphyrin



## S9

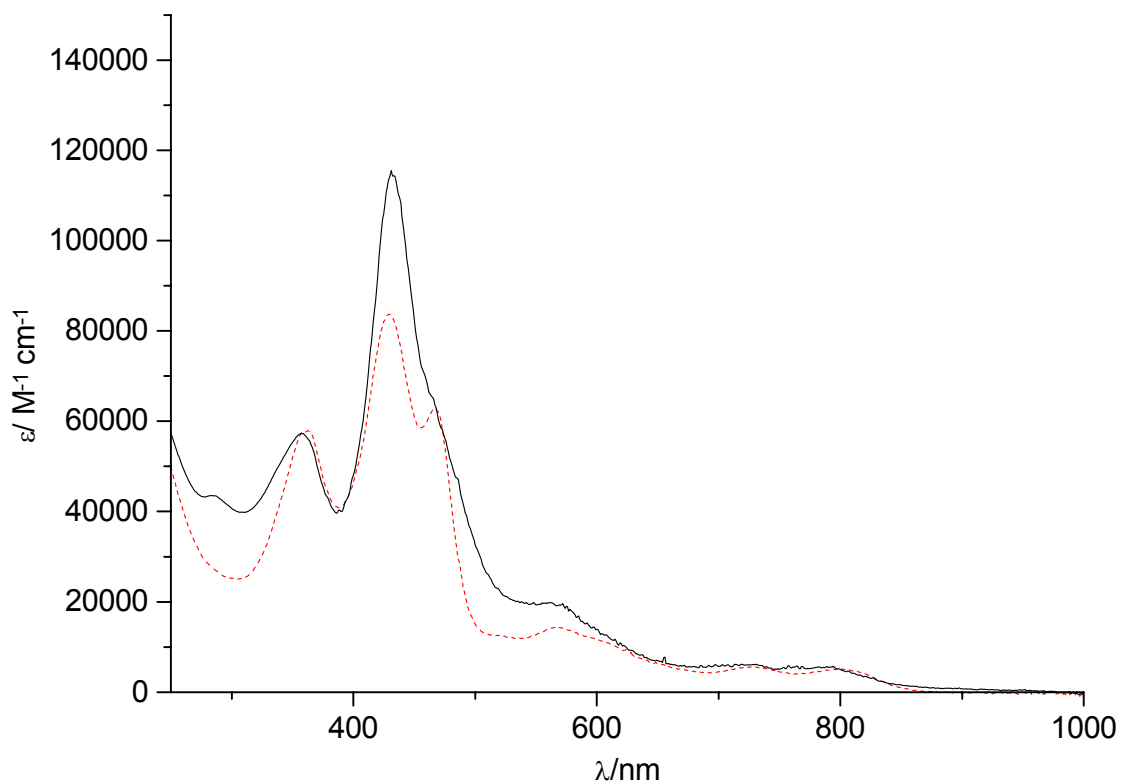

Electronic spectra of **5** (solid line) and **6** (dashed line), CH<sub>2</sub>Cl<sub>2</sub>, 298K.

*Izabela Schmidt and Piotr J. Chmielewski\**, First example of a covalently bound dimeric inverted porphyrin
